# Supplementary material for: Perturbation of Circadian Rhythm Is Associated with Increased Prevalence of Chronic Kidney Disease: Results of the Korean Nationwide Population-Based Survey
Source: MDPI journal article supplement (doi:10.3390/ijerph19095732), 2022-05-08
Supplement: s1 [file s1]

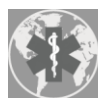

## Supplementary Materials

**Table S1.** General characteristics of participants.

|                             | Control (N=16,779) |            | CKD (N=629) |            | p      |
|-----------------------------|--------------------|------------|-------------|------------|--------|
|                             | N (or MEAN)        | % (or STD) | N (or MEAN) | % (or STD) |        |
| SEX                         |                    |            |             |            | <.0001 |
| Male                        | 7242               | 43.16      | 351         | 55.8       |        |
| Female                      | 9537               | 56.84      | 278         | 44.20      |        |
| Age                         | 50.97              | 16.70      | 60.11       | 16.79      | <.0001 |
| BMI                         | 23.92              | 3.53       | 25.09       | 3.95       | <.0001 |
| Education                   |                    |            |             |            | <.0001 |
| Completion of middle school | 5030               | 30.02      | 308         | 48.97      |        |
| Higher than high school     | 11728              | 69.98      | 321         | 51.03      |        |
| Smoking status              |                    |            |             |            | <.0001 |
| No                          | 10185              | 60.85      | 306         | 48.88      |        |
| Yes                         | 6553               | 39.15      | 320         | 51.12      |        |
| Drinking status             |                    |            |             |            | <.0001 |
| No                          | 1825               | 10.90      | 105         | 16.75      |        |
| Yes                         | 14918              | 89.10      | 522         | 83.25      |        |
| Physical activity           |                    |            |             |            | <.0001 |
| <2 days/week                | 15404              | 91.83      | 607         | 96.50      |        |
| ≥2 days/week                | 1371               | 8.17       | 22          | 3.50       |        |
| Diabetes                    |                    |            |             |            | <.0001 |
| No                          | 15305              | 91.22      | 425         | 67.57      |        |
| Yes                         | 1474               | 8.78       | 204         | 32.43      |        |
| Hypertension                |                    |            |             |            | <.0001 |
| No                          | 12876              | 76.74      | 262         | 41.65      |        |
| Yes                         | 3903               | 23.26      | 367         | 58.35      |        |
| Sleep onset time            |                    |            |             |            | <.0001 |
| Early bedtime               | 1990               | 11.98      | 144         | 22.97      |        |
| Mid bedtime                 | 13261              | 79.81      | 443         | 70.65      |        |
| Late bedtime                | 1365               | 8.21       | 40          | 6.38       |        |
| Sleep duration              |                    |            |             |            | 0.004  |
| <6 hours/day                | 2389               | 14.24      | 76          | 12.08      |        |
| 6–<8 hours/day              | 9319               | 55.54      | 325         | 51.67      |        |
| ≥8 hours/day                | 5071               | 30.22      | 228         | 36.25      |        |
| SBP                         | 118.54             | 16.54      | 127.72      | 19.12      | <.0001 |
| DBP                         | 75.35              | 10.05      | 76.05       | 13.19      | 0.189  |
| Cr                          | 0.8                | 0.17       | 1.28        | 1.00       | <.0001 |
| FBG                         | 100.7              | 23.24      | 117.47      | 43.79      | <.0001 |
| TG                          | 134.64             | 109.49     | 170.98      | 149.65     | <.0001 |

The data are shown as N (%) for categorical variables or mean for continuous variables, and p-values were calculated using the chi-squared test or Student's t-test. CKD, chronic kidney disease (CKD was defined by eGFR threshold of 75, 60, and 45 mL/min/1.73 m<sup>2</sup> for younger than 40, 40 to 64, and 65 years or older, respectively, or a positive dipstick urinalysis); N, number; STD, standard deviation; BMI, body mass index; SBP, systolic blood pressure; DBP, diastolic blood pressure; Cr, creatinine; FBG, fasting blood glucose; TG, triglyceride.

**Table S2.** Associations between sleep onset time and CKD in stratified analyses.

|                             | Early bedtime |        |       |          | Mid bedtime |  | Late bedtime |        |        | P for Interaction |
|-----------------------------|---------------|--------|-------|----------|-------------|--|--------------|--------|--------|-------------------|
|                             | OR            | 95% CI |       | <i>p</i> |             |  | OR           | 95% CI |        | <i>p</i>          |
| Age                         |               |        |       |          |             |  |              |        |        | 0.229             |
| <65                         | 1.197         | 0.810  | 1.768 | 0.367    | Ref         |  | 1.082        | 0.723  | 1.619  | 0.701             |
| ≥65                         | 1.051         | 0.867  | 1.273 | 0.615    | Ref         |  | 1.789        | 1.091  | 2.933  | 0.021             |
| SEX                         |               |        |       |          |             |  |              |        |        | 0.637             |
| Male                        | 1.011         | 0.800  | 1.278 | 0.924    | Ref         |  | 1.295        | 0.836  | 2.006  | 0.247             |
| Female                      | 1.092         | 0.855  | 1.396 | 0.479    | Ref         |  | 1.713        | 1.103  | 2.661  | 0.017             |
| BMI                         |               |        |       |          |             |  |              |        |        | 0.453             |
| <25                         | 1.106         | 0.883  | 1.384 | 0.382    | Ref         |  | 1.727        | 1.156  | 2.580  | 0.008             |
| ≥25                         | 0.981         | 0.759  | 1.269 | 0.886    | Ref         |  | 1.203        | 0.738  | 1.962  | 0.459             |
| Education                   |               |        |       |          |             |  |              |        |        | 0.878             |
| Completion of middle school | 1.064         | 0.871  | 1.300 | 0.544    | Ref         |  | 1.629        | 0.990  | 2.680  | 0.055             |
| Higher than high school     | 1.019         | 0.728  | 1.426 | 0.912    | Ref         |  | 1.393        | 0.935  | 2.077  | 0.103             |
| Smoking status              |               |        |       |          |             |  |              |        |        | 0.944             |
| No                          | 1.044         | 0.830  | 1.311 | 0.715    | Ref         |  | 1.561        | 0.993  | 2.454  | 0.054             |
| Yes                         | 1.057         | 0.822  | 1.359 | 0.667    | Ref         |  | 1.413        | 0.922  | 2.164  | 0.113             |
| Drinking status             |               |        |       |          |             |  |              |        |        | 0.643             |
| No                          | 1.090         | 0.778  | 1.527 | 0.615    | Ref         |  | 2.066        | 0.966  | 4.417  | 0.061             |
| Yes                         | 1.039         | 0.852  | 1.267 | 0.707    | Ref         |  | 1.391        | 0.987  | 1.960  | 0.060             |
| Physical activity           |               |        |       |          |             |  |              |        |        | 0.150             |
| <2 days/week                | 1.032         | 0.867  | 1.229 | 0.721    | Ref         |  | 1.406        | 1.017  | 1.943  | 0.039             |
| ≥2 days/week                | 2.570         | 0.797  | 8.290 | 0.114    | Ref         |  | 3.347        | 1.084  | 10.334 | 0.036             |

Adjusted for age, sex, education level, smoking, drinking, physical activity, BMI, SBP, DBP, FBG, TG, comorbidities, such as hypertension, diabetes, hyperlipidemia, cerebrovascular diseases, myocardial infarction, and angina pectoris; OR, odds ratio; CI, confidence interval; Ref, reference.

**Table S3.** Newly diagnosed CKD prevalence among participants with CKD risk factors or a history of CKD according to sleep onset time.

|                  | MODEL 1 |             |          | MODEL 2 |             |          | MODEL 4 |             |          |
|------------------|---------|-------------|----------|---------|-------------|----------|---------|-------------|----------|
|                  | OR      | 95% CI      | <i>p</i> | OR      | 95% CI      | <i>p</i> | OR      | 95% CI      | <i>p</i> |
| Sleep onset time |         |             | <.0001   |         |             | 0.243    |         |             | 0.303    |
| Early bedtime    | 1.486   | 1.249 1.768 |          | 0.980   | 0.817 1.176 |          | 0.974   | 0.808 1.173 |          |
| Mid bedtime      |         | REF         |          |         | REF         |          |         | REF         |          |
| Late bedtime     | 1.066   | 0.720 1.578 |          | 1.405   | 0.935 2.113 |          | 1.369   | 0.904 2.075 |          |

Diabetes, hypertension, hyperlipidemia, and cardiovascular disease were identified as risk factors for CKD. Model 1: unadjusted; Model 2: adjusted by age and sex; Model 4: Model 2 + education level, smoking, drinking, physical activity, and BMI; OR, odds ratio; CI, confidence interval; Ref, reference.

**Table S4.** General characteristics of participants providing work schedule information.

|                        | Control (N=11,125) |            | CKD (N=431) |            | <i>p</i> |
|------------------------|--------------------|------------|-------------|------------|----------|
|                        | N (or MEAN)        | % (or STD) | N (or MEAN) | % (or STD) |          |
| Sleep onset time       |                    |            |             |            | <.0001   |
| Early bedtime          | 1013               | 9.21       | 95          | 22.14      |          |
| Mid bedtime            | 8996               | 81.82      | 312         | 72.73      |          |
| Late bedtime           | 986                | 8.97       | 22          | 5.13       |          |
| Sleep duration         |                    |            |             |            | 0.003    |
| <6 hours/day           | 1520               | 13.66      | 50          | 11.6       |          |
| 6–<8 hours/day         | 6543               | 58.81      | 230         | 53.36      |          |
| ≥8 hours/day           | 3062               | 27.52      | 151         | 35.03      |          |
| Work schedule          |                    |            |             |            | 0.326    |
| Day shift              | 9608               | 86.36      | 387         | 89.79      |          |
| Afternoon shift        | 1077               | 9.68       | 29          | 6.73       |          |
| Night shift            | 220                | 1.98       | 8           | 1.86       |          |
| Split shift            | 91                 | 0.82       | 3           | 0.70       |          |
| 24-hour rotating shift | 129                | 1.16       | 4           | 0.93       |          |

The data are shown as N (%) for categorical variables or mean for continuous variables, and p-values were calculated using the chi-squared test or Student's t-test. CKD, chronic kidney disease; N, number.

**Table S5.** Newly diagnosed CKD prevalence according to sleep onset time among participants providing work schedule information.

|                  | MODEL 1 |             |          | MODEL 5 |             |          | MODEL 6 |             |          |
|------------------|---------|-------------|----------|---------|-------------|----------|---------|-------------|----------|
|                  | OR      | 95% CI      | <i>p</i> | OR      | 95% CI      | <i>p</i> | OR      | 95% CI      | <i>p</i> |
| Sleep onset time |         |             | 0.018    |         |             | 0.105    |         |             | 0.329    |
| Early bedtime    | 2.160   | 1.266 3.685 |          | 1.859   | 1.045 3.306 |          | 1.524   | 0.821 2.828 |          |
| Mid bedtime      |         | REF         |          |         | REF         |          |         | REF         |          |
| Late bedtime     | 1.191   | 0.700 2.025 |          | 1.098   | 0.616 1.960 |          | 1.232   | 0.674 2.252 |          |

CKD was defined as new onset CKD in participants without CKD risk factors or a history of CKD. Model 1: unadjusted; Model 5: adjusted by age, sex, work schedule; Model 6: Model 5 + education level, smoking, drinking, physical activity, BMI and sleep duration; OR, odds ratio; CI, confidence interval; Ref, reference.
